# Supplementary material for: A model based on Rock-Eval thermal analysis to quantify the size of the centennially persistent organic carbon pool in temperate soils
Source: Copernicus journal article supplement (doi:10.5194/bg-15-2835-2018), 2018-05-09
Supplement: Supplementary file 1 [file bg-15-2835-2018-supplement.pdf]

Supplement of Biogeosciences, 15, 2835–2849, 2018  
<https://doi.org/10.5194/bg-15-2835-2018-supplement>  
© Author(s) 2018. This work is distributed under  
the Creative Commons Attribution 4.0 License.

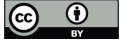

*Supplement of*

## **A model based on Rock-Eval thermal analysis to quantify the size of the centennially persistent organic carbon pool in temperate soils**

**Lauric Cécillon et al.**

*Correspondence to:* Lauric Cécillon ([lauric.cecillon@irstea.fr](mailto:lauric.cecillon@irstea.fr))

The copyright of individual parts of the supplement might differ from the CC BY 4.0 License.

10 **Table S1: Basic characteristics of the four long-term agronomic experimental sites used for the reference soil sample set. Abbreviation: *LTBF*, long-term bare fallow.**

| <b>Site</b>                   | <b>Latitude,<br/>longitude</b> | <b>Mean annual<br/>temperature<br/>(°C)</b> | <b>Mean annual<br/>precipitation<br/>(mm)</b> | <b>Land use<br/>before<br/>experiment</b> | <b>Sampling<br/>depth (cm)</b> | <b>Soil texture<br/>(%, clay/silt/sand)</b> |
|-------------------------------|--------------------------------|---------------------------------------------|-----------------------------------------------|-------------------------------------------|--------------------------------|---------------------------------------------|
| Versailles, France            | 48°48N, 2°08E                  | 10.7                                        | 628                                           | grassland                                 | 25                             | 17/57/26                                    |
| Rothamsted,<br>United Kingdom | 51°82N, 0°35E                  | 9.5                                         | 712                                           | grassland                                 | 23                             | 25/62/13                                    |
| Ultuna, Sweden                | 59°49N, 17°38E                 | 5.5                                         | 533                                           | arable                                    | 20                             | 36/41/23                                    |
| Grignon, France               | 48°51N, 1°55E                  | 10.7                                        | 649                                           | grassland                                 | 25                             | 16/54/30                                    |

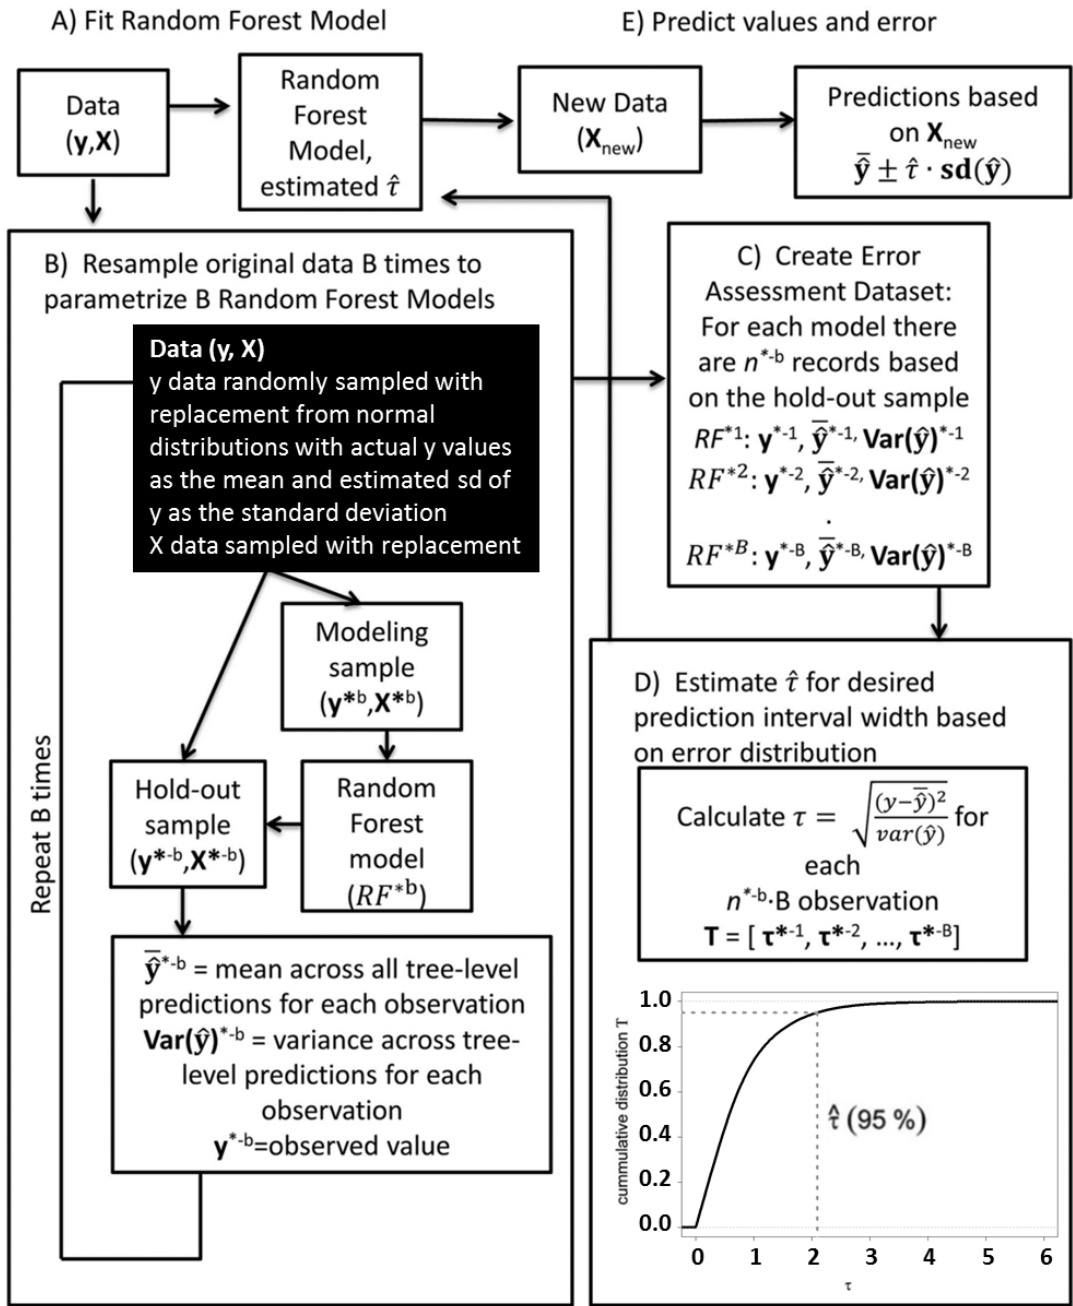

Figure S1: Error propagation scheme in the random forests regression model (adapted from Coulston *et al.* (2016) and modified).

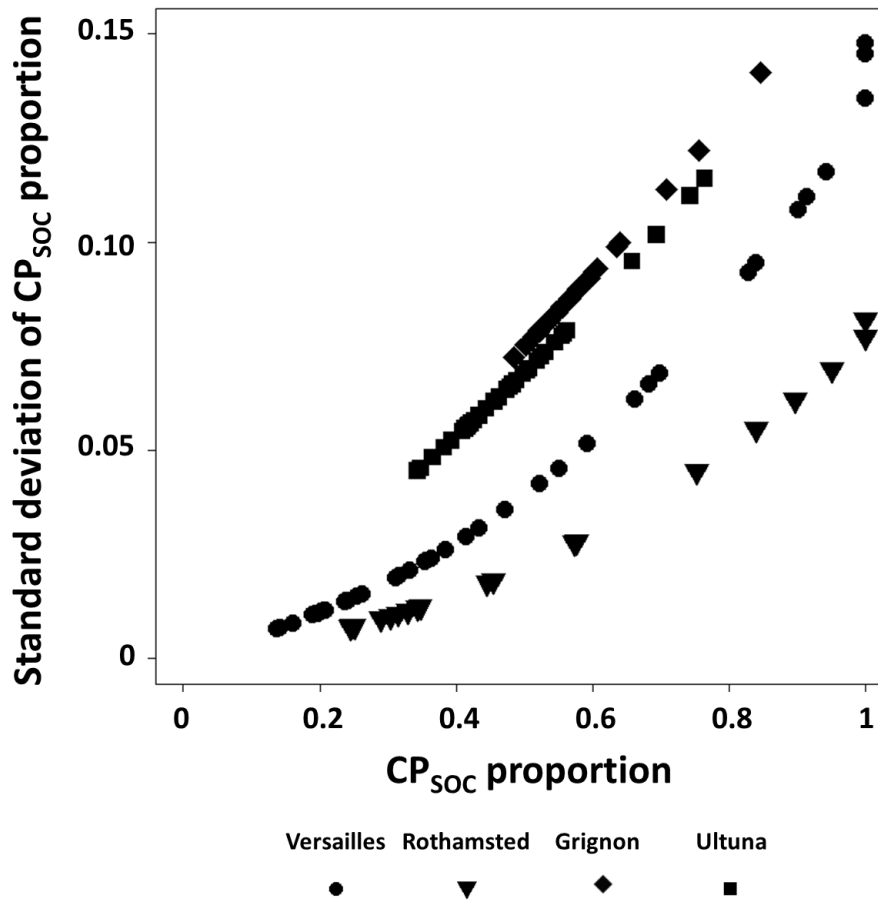

5 **Figure S2:** Standard deviation of the  $CP_{SOC}$  proportion as a function of the  $CP_{SOC}$  proportion in the reference soil sample set (n = 118).

### Supplementary reference

Coulston, J.W., Blinn, C.E., Thomas, V.A., and Wynne, R.H.: Approximating prediction uncertainty for random forest regression models. *Photogramm. Eng. Remote Sens.*, 82, 189–197, 2016.
